# Supplementary material for: Rapid Screening of Active Components with an Osteoclastic Inhibitory Effect in Herba epimedii Using Quantitative Pattern–Activity Relationships Based on Joint-Action Models
Source: PubMed Central journal article supplement (PMC6151442; doi:10.3390/molecules22101767), 2017-10-19
Supplement: molecules-22-01767-s001.pdf [file molecules-22-01767-s001.pdf]

Supplementary Materials:

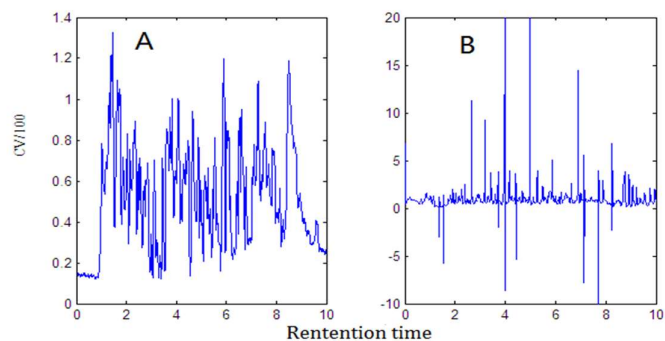

Figure S1. CV (RSD) of compounds' area in all *Herba Epimedii* samples in total ions chromatogram (TIC, A) and liquid chromatogram (B).

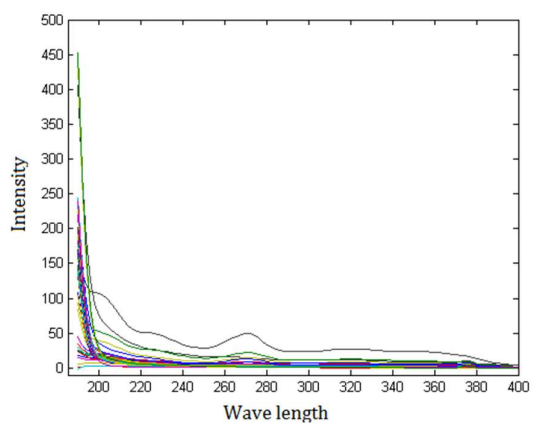

Figure S2. Overlapped UV spectrum of 73 compounds extracted from liquid chromatogram.

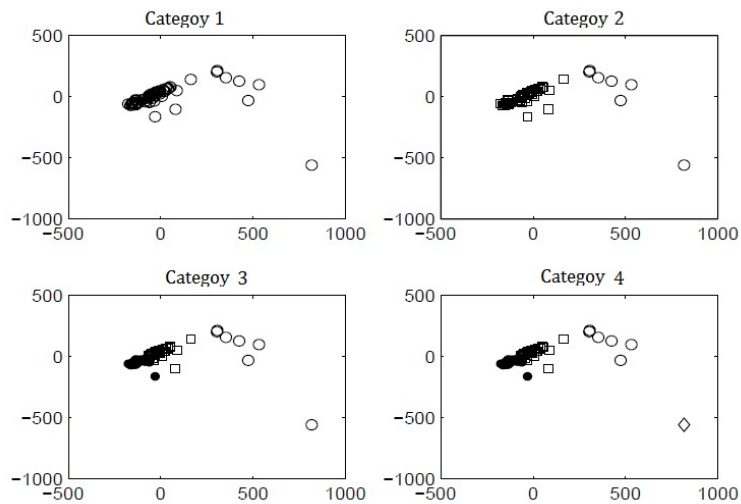

Figure S3. Principle component analysis (PCA) score plot of UV spectrum of 73 features.

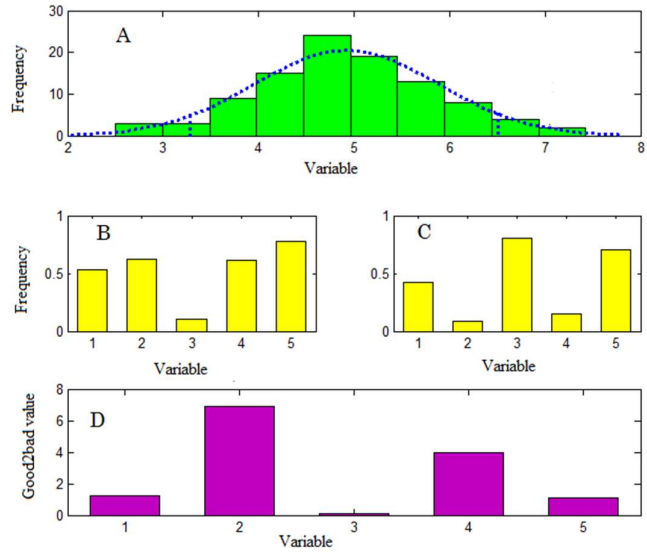

**Figure S4.** Principle of Good2Bad value based on Monte Carlo Sampling: normal distribution sub-models errors (A), variable frequency of models with small error (B), variable frequency of models with big error (C) and Good2bad values (D).

**Table S1.** Final concentrations of 6 standards in mixtures 1-8.

| Mixtures | Standards/ $\mu\text{g}/\text{mL}$ |        |        |       |        |        |
|----------|------------------------------------|--------|--------|-------|--------|--------|
|          | 1                                  | 2      | 3      | 4     | 5      | 6      |
| 1        | 19.46                              | 47.69  | 44.48  | 76.63 | 145.98 | 165.73 |
| 2        | 2.39                               | 7.37   | 485.72 | 0.05  | 2.00   | 2.45   |
| 3        | 159.29                             | 269.56 | 0.34   | 45.14 | 9.21   | 16.43  |
| 4        | 169.51                             | 1.57   | 308.33 | 0.71  | 17.04  | 2.81   |
| 5        | 445.16                             | 13.43  | 0.01   | 29.88 | 10.45  | 1.05   |
| 6        | 455.86                             | 21.88  | 18.84  | 1.21  | 2.01   | 0.18   |
| 7        | 174.27                             | 14.57  | 301.00 | 4.85  | 2.78   | 2.49   |
| 8        | 127.26                             | 112.03 | 0.30   | 14.32 | 216.20 | 29.87  |

**Table S2.** Information of *Herba Epimedii* leaf samples purchased in experiment.

| Samples | Taxon                                                | Source                       |
|---------|------------------------------------------------------|------------------------------|
| 1       | <i>Epimedium koreanum</i> Nakai                      | Haerbin, Heilongjiang, China |
| 2       | <i>Epimedium brevicornu</i> Maxim                    | Lingzhou, Shanxi, China      |
| 3       | <i>Epimedium koreanum</i> Nakai                      | Dalian, LiaoNing, China      |
| 4       | <i>Epimedium pubescens</i> Maxim                     | Bazhong, SiChuan, China      |
| 5       | <i>Epimedium brevicornu</i> Maxim                    | Minxian, GanSu, China        |
| 6       | <i>Epimedium sagittatum</i> (Sieb. et Zucc.) Maxim.  | Quanzhou, GuangXi, China     |
| 7       | <i>Epimedium acuminatum</i> Franch                   | Zhunyi, GuiZhou, China       |
| 8       | <i>Epimedium baojingense</i> Q.L. Chen and B.M. Yang | Zhuzhou, HuNan, China        |
| 9       | <i>Epimedium sagittatum</i> (Sieb. et Zucc.) Maxim.  | Yunshan, AnHui, China        |
| 10      | <i>Epimedium wushanense</i> T.S. Ying                | Cangzhou, HeBei, China       |
| 11      | <i>Epimedium lishihchenii</i> Stearn                 | Lushan, JiangXi, China       |
| 12      | <i>Epimedium koreanum</i> Nakai                      | Baotou, NeiMeng, China       |

**Table S3.** Uniform design table of  $U_7(7^6)$ .

| Levels | Factors  |          |          |          |          |          |
|--------|----------|----------|----------|----------|----------|----------|
|        | Factor 1 | Factor 2 | Factor 3 | Factor 4 | Factor 5 | Factor 6 |
| 1      | 1        | 2        | 3        | 4        | 5        | 6        |
| 2      | 2        | 4        | 6        | 1        | 3        | 5        |
| 3      | 3        | 6        | 2        | 5        | 1        | 4        |
| 4      | 4        | 1        | 5        | 2        | 6        | 3        |
| 5      | 5        | 3        | 1        | 6        | 4        | 2        |
| 6      | 6        | 5        | 4        | 3        | 2        | 1        |
| 7      | 7        | 7        | 7        | 9        | 7        | 7        |
